# Supplementary material for: Systematic review and meta-analysis of the impact of preconception lifestyle interventions on fertility, obstetric, fetal, anthropometric and metabolic outcomes in men and women
Source: Oxford University Press journal article supplement (doi:10.1093/humrep/dex241), 2017-06-22
Supplement: dex241SupplementaryTableSI.pdf [file dex241SupplementaryTableSI.pdf]

**Supplementary Table SI Outcome measures in PICO framework.**

|                       |                                                                                                                                                                                                                                                                       |
|-----------------------|-----------------------------------------------------------------------------------------------------------------------------------------------------------------------------------------------------------------------------------------------------------------------|
| Fertility outcomes    | Natural conception, conception after ART                                                                                                                                                                                                                              |
|                       | Time to conception                                                                                                                                                                                                                                                    |
|                       | Menstrual regularity                                                                                                                                                                                                                                                  |
|                       | Ovulation                                                                                                                                                                                                                                                             |
|                       | Pregnancy                                                                                                                                                                                                                                                             |
|                       | Male fertility parameters                                                                                                                                                                                                                                             |
|                       | ART outcomes (e.g. fertilization rate, drug doses, duration of stimulation, duration of gonadotrophin treatment, cycle cancellation, number of cycles, number of oocytes retrieved, number of oocytes fertilized, number of embryo transferred and implantation rate) |
|                       |                                                                                                                                                                                                                                                                       |
| Obstetric outcomes    | Gestational complications (e.g. ectopic pregnancy, miscarriage, still birth, (pre)eclampsia and preterm/post-term labor)                                                                                                                                              |
|                       | Delivery complications (e.g. prolonged labor, dystocia, breech presentation, cord prolapse/compression and amniotic fluid embolism)                                                                                                                                   |
|                       | Maternal post-partum complications (e.g. post-partum hemorrhage)                                                                                                                                                                                                      |
|                       | ART adverse outcomes (e.g. single and multiple pregnancies/ovarian hyperstimulation syndrome)                                                                                                                                                                         |
| Fetal outcomes        | Live birth                                                                                                                                                                                                                                                            |
|                       | Intrauterine complications (e.g. intrauterine growth retardation and placental abnormality)                                                                                                                                                                           |
|                       | Embryonic developmental abnormalities                                                                                                                                                                                                                                 |
|                       | Meconium aspiration                                                                                                                                                                                                                                                   |
|                       | Admission to neonatal intensive care                                                                                                                                                                                                                                  |
|                       | Developmental complications (e.g. birth defects, low-birth weight, macrosomia, small/large for gestational age, congenital anomalies, neonatal death and low APGAR score)                                                                                             |
| Infant/child outcomes | Growth and development (both physical and mental development)                                                                                                                                                                                                         |
| Other outcomes        | Maternal/paternal quality of life                                                                                                                                                                                                                                     |
|                       | Anthropometry in parents (e.g. weight, BMI and blood pressure)                                                                                                                                                                                                        |
|                       | Metabolic profile in parents (e.g. cholesterol, glucose, insulin and lipids)                                                                                                                                                                                          |
|                       | Hormonal profile in parents: (e.g. testosterone, SHBG, FSH, LH and prolactin)                                                                                                                                                                                         |

SHBG, sex hormone-binding globulin.
