# Supplementary material for: Systematic review and meta-analysis of the impact of preconception lifestyle interventions on fertility, obstetric, fetal, anthropometric and metabolic outcomes in men and women
Source: Oxford University Press journal article supplement (doi:10.1093/humrep/dex241), 2017-06-22
Supplement: dex241SupplementaryTableSIII.pdf [file dex241SupplementaryTableSIII.pdf]

**Supplementary Table SIII Excluded studies after full text review with reasons for exclusion.**

| Author                        | Year | Title                                                                                                                                                                                | Journal                                                                 | Reason for exclusion                                                                                                                          |
|-------------------------------|------|--------------------------------------------------------------------------------------------------------------------------------------------------------------------------------------|-------------------------------------------------------------------------|-----------------------------------------------------------------------------------------------------------------------------------------------|
| Althabe, F <i>et al.</i>      | 2012 | Antenatal corticosteroids trial in preterm births to increase neonatal survival in developing countries: study protocol                                                              | Reproductive Health                                                     | No relevant outcome. Focused on minimizing child abuse and increasing interconception time                                                    |
| Gong, R <i>et al.</i>         | 2010 | A case-control study of the effects of pregnancy planning on neural tube defects and its primary preventive measures                                                                 | Birth Defects Research                                                  | Not RCT. Case control                                                                                                                         |
| More, N.S <i>et al.</i>       | 2012 | Community mobilization in Mumbai slums to improve perinatal care and outcomes: a cluster randomized controlled trial                                                                 | PLoS Medicine/Public Library of Science                                 | Included both pregnant and non-pregnant women                                                                                                 |
| Shah More, N <i>et al.</i>    | 2013 | Community resource centres to improve the health of women and children in Mumbai slums: study protocol for a cluster randomized controlled trial                                     | Trials [Electronic Resource]                                            | Not RCT. Study protocol                                                                                                                       |
| Morin, P <i>et al.</i>        | 2001 | Concept analysis of pregnancy planning drawn from women of childbearing age                                                                                                          | Health Promotion Practice                                               | Not RCT. Literature review                                                                                                                    |
| McCreary, L.L <i>et al.</i>   | 2003 | Context-based advocacy for HIV-positive women making reproductive decisions                                                                                                          | Journal of the Association of Nurses in AIDS Care                       | Focused on family and pregnancy planning (mainly contraception) for HIV-positive women                                                        |
| Aljadir, L.P                  | 1988 | Dietary habits in transition to parenthood: Dietary habits before pregnancy, during pregnancy and in young families                                                                  | Marriage & Family Review                                                | Not RCT. Literature review                                                                                                                    |
| Opray, N <i>et al.</i>        | 2015 | Directed preconception health programs and interventions for improving pregnancy outcomes for women who are overweight or obese                                                      | Cochrane Database of Systematic Reviews                                 | Not RCT. Systematic review.                                                                                                                   |
| Petrofsky, J <i>et al.</i>    | 2010 | The effect of an exercise and diet program on fitness, posture and self image in women                                                                                               | Journal of Applied Research                                             | Did not meet population inclusion criteria. Compares post-partum exercise group, post-partum control group and pre-pregnancy group (non-moms) |
| Tu, N <i>et al.</i>           | 2014 | Effect of animal-source food supplement prior to and during pregnancy on birth weight and prematurity in rural Vietnam: a brief study description                                    | Food & Nutrition Bulletin                                               | Did not meet population inclusion criteria. Focused on improving birth weight with improvement of malnutrition.                               |
| Elsinga, J <i>et al.</i>      | 2008 | The effect of preconception counselling on lifestyle and other behaviour before and during pregnancy                                                                                 | Womens Health Issues                                                    | Did not meet population inclusion criteria. Focused on pregnant women.                                                                        |
| Whitehill, K <i>et al.</i>    | 2013 | The effectiveness of bundled health messages on recall                                                                                                                               | American Journal of Health Promotion                                    | Did not meet outcome inclusion criteria                                                                                                       |
| Winterbottom, J <i>et al.</i> | 2009 | The effectiveness of preconception counselling to reduce adverse pregnancy outcome in women with epilepsy: what's the evidence?                                                      | Epilepsy & Behavior                                                     | Not RCT. Systematic review                                                                                                                    |
| de Smit, D.J <i>et al.</i>    | 2015 | Effects of a simple educational intervention in well-baby clinics on women's knowledge about and intake of folic acid supplements in the periconceptional period: a controlled trial | Public Health Nutrition                                                 | Focused solely on folic acid supplementation                                                                                                  |
| Glueck, C.L <i>et al.</i>     | 2013 | Effects of metformin-diet intervention before and throughout pregnancy on obstetric and neonatal outcomes in patients with polycystic ovary syndrome                                 | Current Medical Research & Opinion                                      | Not RCT. Prospective study                                                                                                                    |
| Jaffiol, C <i>et al.</i>      | 2000 | [Evaluation of the benefits brought by pregnancy planning in type one diabetes mellitus]                                                                                             | Bulletin de l'Academie Nationale de Medecine                            | Focused on incidence of the preconceptional management of type one diabetes on outcome of pregnancy                                           |
| H. Wang and Z. Li             | 1996 | [Evaluation on the informed consent, effectiveness in improving the knowledge of congenital defects and use of vitamin among women in Mancheng County, Herbei province]              | Chung-Hua Liu Hsing Ping Hsueh Tsa Chih Chinese Journal of Epidemiology | Not RCT. Survey of knowledge in vitamins and birth defect post education.                                                                     |
| El-Kamary, S.S <i>et al.</i>  | 2004 | Hawaii's healthy start home visiting program: determinants and impact of rapid repeat birth                                                                                          | Pediatrics                                                              | No relevant outcome. Focused on minimizing child abuse and increasing inter-conception time                                                   |
| Rana, R.B <i>et al.</i>       | 2012 | Health improvement for disadvantaged people in Nepal—An evaluation                                                                                                                   | BMC International Health and Human Rights                               | No intervention group                                                                                                                         |

Continued

**Supplementary Table SIII** *Continued*

| Author                              | Year | Title                                                                                                                                                                                                                 | Journal                                      | Reason for exclusion                                                                    |
|-------------------------------------|------|-----------------------------------------------------------------------------------------------------------------------------------------------------------------------------------------------------------------------|----------------------------------------------|-----------------------------------------------------------------------------------------|
| Fischl, A.F <i>et al.</i>           | 2010 | Impact of a preconception counseling program for teens with type one diabetes (READY-Girls) on patient-provider interaction, resource utilization, and cost                                                           | Diabetes Care                                | Participants had no immediate intention to become pregnant                              |
| Mahamed, F, <i>et al.</i>           | 2012 | Impact of family planning health education on the knowledge and attitude among Yasoujjan women                                                                                                                        | Global Journal of Health Science             | No relevant outcome and focused on pre-marital counseling, not preconception counseling |
| Hogan, V.K <i>et al.</i>            | 2013 | The impact of social disadvantage on preconception health, illness, and well-being: an intersectional analysis                                                                                                        | American Journal of Health Promotion         | Not RCT. Longitudinal study.                                                            |
| Potdar, R.D <i>et al.</i>           | 2014 | Improving women's diet quality preconceptionally and during gestation: effects on birth weight and prevalence of low birth weight—a randomized controlled efficacy trial in India (Mumbai Maternal Nutrition Project) | American Journal of Clinical Nutrition       | Focused on micronutrients in diet supplementation                                       |
| Turan, J.M <i>et al.</i>            | 2001 | Including expectant fathers in antenatal education programmes in Istanbul, Turkey                                                                                                                                     | Reproductive Health Matters                  | Participants were on men whose wives are pregnant (not pre-conception)                  |
| Charron-Prochownik, D <i>et al.</i> | 2009 | Innovative measure of knowledge associated with attitudes and behaviors regarding reproductive health in teens with diabetes                                                                                          | Canadian Journal of Diabetes                 | Participants had no immediate intention to become pregnant                              |
| Lu, M.C <i>et al.</i>               | 2010 | Innovative strategies to reduce disparities in the quality of prenatal care in underresourced settings                                                                                                                | Medical Care Research & Review               | Not RCT. Literature review                                                              |
| Doyle, W <i>et al.</i>              | 1999 | Interpregnancy nutrition intervention with mothers of low-birth weight babies living in an inner city area: a feasibility study                                                                                       | Journal of Human Nutrition & Dietetics       | No relevant outcome.                                                                    |
| Stern, J <i>et al.</i>              | 2013 | Introducing reproductive life plan-based information in contraceptive counselling: an RCT                                                                                                                             | Human Reproduction                           | No relevant outcome.                                                                    |
| Cena, E.R <i>et al.</i>             | 2008 | Learner-centered nutrition education improves folate intake and food-related behaviors in nonpregnant, low-income women of childbearing age                                                                           | Journal of the American Dietetic Association | No relevant outcome.                                                                    |
| Heyns, C.F <i>et al.</i>            | 2008 | Men's Health in Africa. Part I: Reproductive urogenital diseases and human immunodeficiency virus infection                                                                                                           | Journal of Men's Health                      | Not RCT. Literature review                                                              |
| Chacko, M.R <i>et al.</i>           | 2003 | Neural tube defects: knowledge and preconceptional prevention practices in minority young women                                                                                                                       | Pediatrics                                   | Focused on micronutrient supplementation                                                |
| Olds, D.L                           | 2006 | The nurse-family partnership: An evidence-based preventive intervention                                                                                                                                               | Infant Mental Health Journal                 | Participants were pregnant women                                                        |
| Bogaerts, A <i>et al.</i>           | 2014 | Obesity and pregnancy, an epidemiological and intervention study from a psychosocial perspective                                                                                                                      | Facts Views & Vision in Obgyn                | Intervention done during pregnancy                                                      |
| Ruder, E.H <i>et al.</i>            | 2008 | Oxidative stress and antioxidants: exposure and impact on female fertility                                                                                                                                            | Human Reproduction Update                    | Not RCT. Literature review                                                              |
| Lassi, Z.S <i>et al.</i>            | 2014 | Preconception care: caffeine, smoking, alcohol, drugs and other environmental chemical/radiation exposure                                                                                                             | Reproductive Health                          | Not RCT. Systematic review                                                              |
| Hambidge, K. M <i>et al.</i>        | 2014 | Preconception maternal nutrition: a multi-site randomized controlled trial                                                                                                                                            | BMC Pregnancy & Childbirth                   | Focused on micronutrient supplementation                                                |
| Lesko, J and Peaceman, A            | 2012 | Pregnancy outcomes in women after bariatric surgery compared with obese and morbidly obese controls                                                                                                                   | Obstetrics & Gynecology                      | Not RCT. Chart review                                                                   |
| Rono, K. <i>et al.</i>              | 2014 | Prevention of gestational diabetes through lifestyle intervention: study design and methods of a Finnish randomized controlled multicenter trial (RADIEL)                                                             | BMC Pregnancy & Childbirth                   | Not RCT. Study protocol.                                                                |
| Laurence, K.M                       | 1985 | Prevention of neural tube defects by improvement in maternal diet and preconceptional folic acid supplementation                                                                                                      | Progress in Clinical & Biological Research   | Not RCT. Observational study. Focus on folic acid.                                      |
| Kermack, A. J <i>et al.</i>         | 2014 | A randomised controlled trial of a preconceptional dietary intervention in women undergoing IVF treatment (PREPARE trial)                                                                                             | BMC Women's Health                           | Focused on micronutrients                                                               |

*Continued*

**Supplementary Table SIII** *Continued*

| Author                                     | Year | Title                                                                                                                                                                     | Journal                                                            | Reason for exclusion                                       |
|--------------------------------------------|------|---------------------------------------------------------------------------------------------------------------------------------------------------------------------------|--------------------------------------------------------------------|------------------------------------------------------------|
| Watson, M.J<br><i>et al.</i>               | 1999 | A randomized community intervention trial to increase awareness and knowledge of the role of periconceptional folate in women of child-bearing age                        | Health expectations                                                | Focused on folate supplementation                          |
| Charron-Prochownik, D<br><i>et al.</i>     | 2008 | Randomized efficacy trial of early preconception counseling for diabetic teens (READY-girls)                                                                              | Diabetes Care                                                      | Participants had no immediate intention to become pregnant |
| Young, M.F<br><i>et al.</i>                | 2015 | The relative influence of maternal nutritional status before and during pregnancy on birth outcomes in Vietnam                                                            | European Journal of Obstetrics, Gynecology, & Reproductive Biology | Not RCT Cohort study.                                      |
| Rahman, S                                  | 1985 | Role of village practitioners in family planning service delivery system                                                                                                  | Malaysian Journal of Reproductive Health                           | Focused on contraceptive distribution and education        |
| Fortney, J.A and Leong, M                  | 2009 | Saving mother's lives: programs that work                                                                                                                                 | Clinical Obstetrics & Gynecology                                   | Not RCT. Recommendations/guidelines                        |
| Quinlivan, J.A                             | 2004 | Teenagers who plan parenthood                                                                                                                                             | Sexual Health                                                      | Not RCT. Literature review                                 |
| Hilgers, T. W                              | 1980 | Two methods of natural family planning                                                                                                                                    | American Journal of Obstetrics & Gynecology                        | Not RCT. letter to editor                                  |
| Brieger, W.R                               | 2001 | West African Youth Initiative: outcome of a reproductive health education program                                                                                         | Journal of Adolescent Health                                       | Focused on contraception                                   |
| Tsagareli, V<br><i>et al.</i>              | 2006 | Effect of a very-low-calorie diet on in vitro fertilization outcomes                                                                                                      | Fertility and Sterility                                            | Not RCT. Cohort study                                      |
| Mutsaerts, M. A. Q<br><i>et al.</i>        | 2014 | Effects of paternal and maternal lifestyle factors on pregnancy complications and perinatal outcome. A population-based birth-cohort study: the GECKO Drenthe cohort      | Human Reproduction                                                 | Not RCT. cohort study                                      |
| Koivusalo, S.B<br><i>et al.</i>            | 2016 | Gestational Diabetes Mellitus Can Be Prevented by Lifestyle Intervention: The Finnish Gestational Diabetes Prevention Study (RADIEL) A Randomized Controlled Trial        | Diabetes Care                                                      | Participants were pregnant women <20 weeks gestation.      |
| Galletly, C <i>et al.</i>                  | 1996 | Improved pregnancy rates for obese, infertile women following a group treatment program an open pilot study                                                               | General Hospital Psychiatry                                        | Not RCT. Cohort study                                      |
| Crosignani, P. G<br><i>et al.</i>          | 2003 | Overweight and obese anovulatory patients with polycystic ovaries: parallel improvements in anthropometric indices, ovarian physiology and fertility rate induced by diet | Human Reproduction                                                 | Not RCT. prospective study                                 |
| M.-M. Huber-Buchholz, M.M<br><i>et al.</i> | 1999 | Restoration of Reproductive Potential by Lifestyle Modification in Obese Polycystic Ovary Syndrome: Role of Insulin Sensitivity and Luteinizing Hormone                   | The Journal of Clinical Endocrinology & Metabolism                 | Not RCT. Case control                                      |
| Clark, A.M<br><i>et al.</i>                | 1998 | Weight loss in obese infertile women results in improvement in reproductive outcome for all forms of fertility treatment                                                  | Human Reproduction                                                 | Not RCT. Case control                                      |
| Clark, A.M<br><i>et al.</i>                | 1995 | Weight loss results in significant improvement in pregnancy and ovulation rates in anovulatory obese women                                                                | Human Reproduction                                                 | Not RCT. Case control                                      |
| Twigt, J.M <i>et al.</i>                   | 2012 | The preconception diet is associated with the chance of ongoing pregnancy in women undergoing IVF/ICSI treatment                                                          | Human Reproduction                                                 | Not RCT. Cohort study                                      |
| Connor, K.A<br><i>et al.</i>               | 2014 | Preconception health promotion among Maryland women                                                                                                                       | Maternal & Child Health Journal                                    | Not RCT. Cohort study                                      |
| Madsen, N.L<br><i>et al.</i>               | 2013 | Prepregnancy body mass index and congenital heart defects among offspring: a population-based study                                                                       | Congenital Heart Disease                                           | Not RCT. Case-control study                                |
| Maconochie, N<br><i>et al.</i>             | 2007 | Risk factors for first trimester miscarriage—results from a UK-population-based case-control study                                                                        | Central European Journal of Public Health                          | Not RCT. Case-control study                                |

*Continued*

**Supplementary Table SIII** *Continued*

| Author                       | Year | Title                                                                                                                                                                               | Journal                                                            | Reason for exclusion                                  |
|------------------------------|------|-------------------------------------------------------------------------------------------------------------------------------------------------------------------------------------|--------------------------------------------------------------------|-------------------------------------------------------|
| Kalinka, J <i>et al.</i>     | 1996 | Risk factors of intrauterine growth retardation: a study of an urban population in Poland                                                                                           | Central European Journal of Public Health                          | Not RCT. Case-control study                           |
| Hansen, D <i>et al.</i>      | 2001 | [Serious life events and congenital malformations. A national study with a complete follow-up]                                                                                      | Ugeskrift for Laeger                                               | Not RCT. Case-control study                           |
| Czeizel, A.E.                | 1999 | Ten years of experience in periconceptional care                                                                                                                                    | European Journal of Obstetrics, Gynecology, & Reproductive Biology | Not RCT. No control group.                            |
| Seneviratne, S <i>et al.</i> | 2014 | A randomized controlled trial on the effects of antenatal exercise on birth weight and neonatal body composition                                                                    | International Journal of Pediatric Endocrinology                   | Conference presentation. No published paper           |
| Asci, O <i>et al.</i>        | 2016 | Effect of lifestyle interventions of pregnant women on their dietary habits, lifestyle behaviors, and weight gain: a randomized controlled trial                                    | Journal of Health, Population & Nutrition                          | Participants were pregnant women <12 weeks gestation. |
| Huvinen, E <i>et al.</i>     | 2016 | Heterogeneity of maternal characteristics and impact on gestational diabetes (GDM) risk-Implications for universal GDM screening?                                                   | Annals of Medicine                                                 | Participants were pregnant women <20 weeks gestation. |
| Jack B <i>et al.</i>         | 2015 | Reducing Preconception Risks Among African American Women with Conversational Agent Technology                                                                                      | Journal of the American Board of Family Medicine                   | No relevant outcome.                                  |
| Kermack, A.J <i>et al.</i>   | 2015 | Nutritional supplementation and artificial reproductive technique (ART) outcomes                                                                                                    | Reproduction, Fertility, & Development                             | Not RCT. Literature review                            |
| Koivusalo, S.B <i>et al.</i> | 2016 | Gestational Diabetes Mellitus Can Be Prevented by Lifestyle Intervention: The Finnish Gestational Diabetes Prevention Study (RADIEL): A Randomized Controlled Trial                 | Diabetes Care                                                      | Participants were pregnant women <20 weeks gestation. |
| LeBlanc, E.S <i>et al.</i>   | 2016 | Prepare, a randomized trial to promote and evaluate weight loss among overweight and obese women planning pregnancy: Study design and rationale                                     | Contemporary Clinical Trials                                       | Study protocol                                        |
| Legro R.S <i>et al.</i>      | 2016 | Benefit of Delayed Fertility Therapy With Preconception Weight Loss Over Immediate Therapy in Obese Women With PCOS                                                                 | Journal of Clinical Endocrinology & Metabolism                     | Not RCT. Comparison of two previous studies           |
| Moran L.J <i>et al.</i>      | 2016 | Altered Preconception Fatty Acid Intake Is Associated with Improved Pregnancy Rates in Overweight and Obese Women Undertaking in Vitro Fertilisation                                | Nutrients                                                          | Not RCT. secondary cohort analysis of previous study  |
| Sahariah, S.A <i>et al.</i>  | 2016 | A Daily Snack Containing Leafy Green Vegetables, Fruit, and Milk before and during Pregnancy Prevents Gestational Diabetes in a Randomized, Controlled Trial in Mumbai, India       | Journal of Nutrition                                               | Focused on micronutrients in diet supplementation     |
| Skau, J.K.H <i>et al.</i>    | 2016 | A complex behavioural change intervention to reduce the risk of diabetes and prediabetes in the pre-conception period in Malaysia: study protocol for a randomised controlled trial | Trials                                                             | Study protocol                                        |
| Zhou, J <i>et al.</i>        | 2016 | Maternal Prenatal Nutrition and Birth Outcomes on Malnutrition among 7- to 10-Year-Old Children: A 10-Year Follow-Up                                                                | Journal of Pediatrics                                              | Participants were pregnant women                      |

RCT, randomized controlled trial.
